# Supplementary material for: Metal–organic framework derived hierarchical copper cobalt sulfide nanosheet arrays for high-performance solid-state asymmetric supercapacitors
Source: Royal Society of Chemistry journal article supplement (doi:10.1039/c9ta00265k), 2019-01-01
Supplement: c9ta00265k1.pdf [file c9ta00265k1.pdf]

Supporting Information

**Metal organic framework derived hierarchical copper cobalt sulfide nanosheet arrays  
for high-performance solid-state asymmetric supercapacitors**

Ahmed Bahaa <sup>1</sup>, Jayaraman Balamurugan<sup>1</sup>, Nam Hoon Kim <sup>1\*</sup>, Joong Hee Lee <sup>1,2\*</sup>

<sup>1</sup>Advanced Materials Institute of BIN Convergence (BK plus Global) & Department of BIN  
Convergence Technology, Chonbuk National University

<sup>2</sup>Center for Carbon Composite Materials, Department of Polymer & Nano Science and  
Technology, Chonbuk National University, Jeonju, Jeonbuk, 54896, Republic of Korea

\*Corresponding to Prof. Nam Hoon Kim ([nhk@chonbuk.ac.kr](mailto:nhk@chonbuk.ac.kr))  
Prof. Joong Hee Lee ([jhl@chonbuk.ac.kr](mailto:jhl@chonbuk.ac.kr))

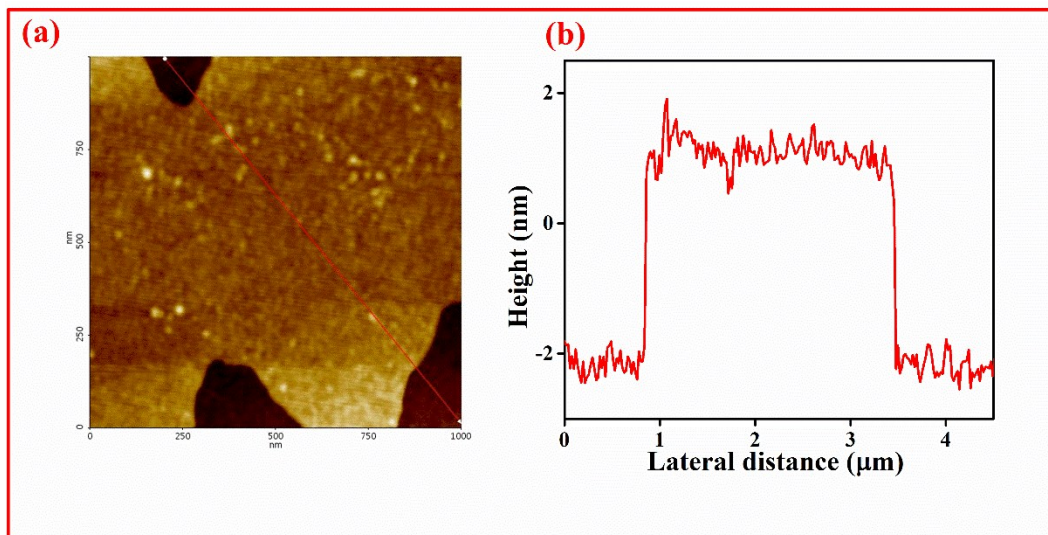

**Fig. S1** a, b 2D AFM image and its height profile of  $\text{CuCo}_2\text{S}_4$  NS arrays, representing thickness around 2 nm.

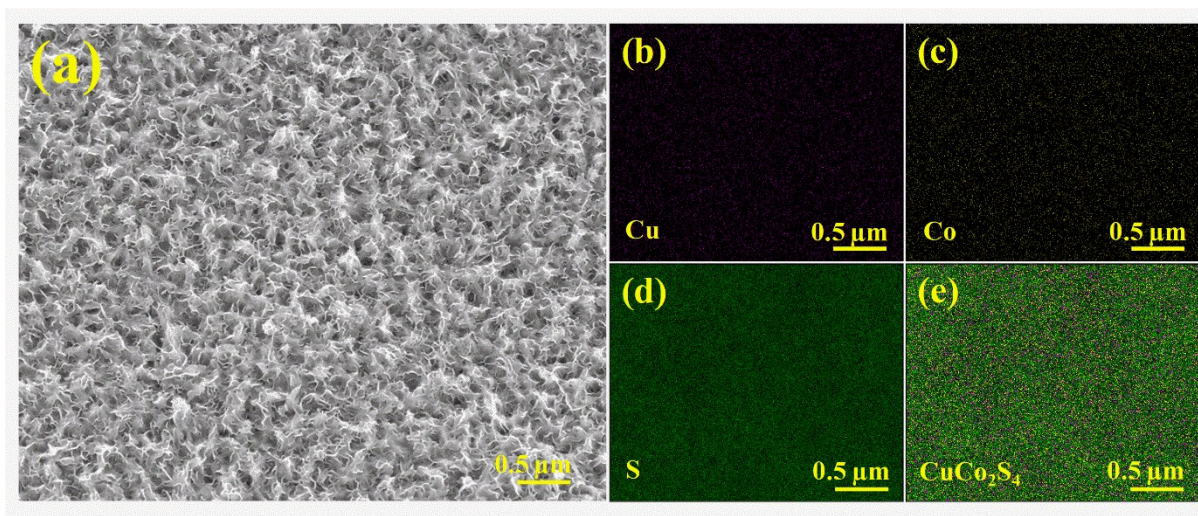

**Fig. S2** a–e SEM image of  $\text{CuCo}_2\text{S}_4$  NS arrays and its corresponding SEM-EDS color mapping with respect to Cu-K, Co-K and S-K.

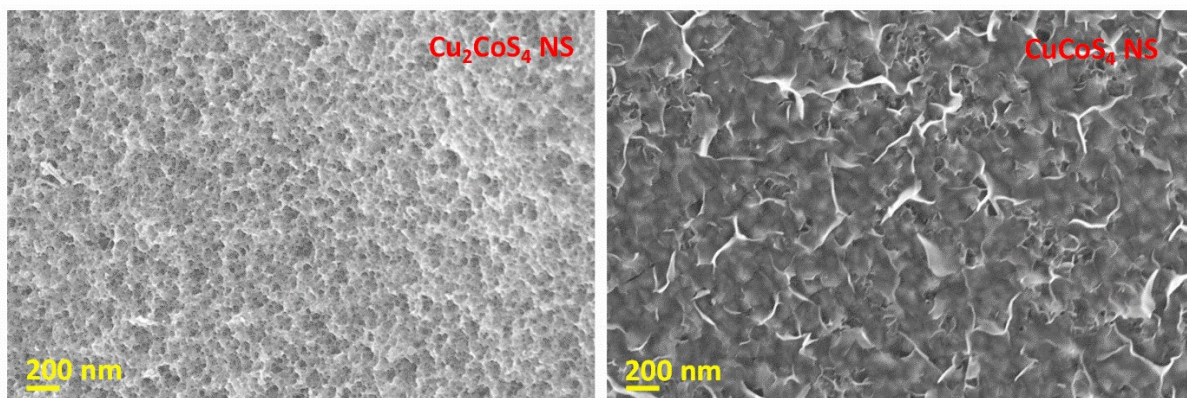

**Fig. S3** SEM images of Cu<sub>2</sub>CoS<sub>4</sub> and CuCoS<sub>4</sub> NS arrays.

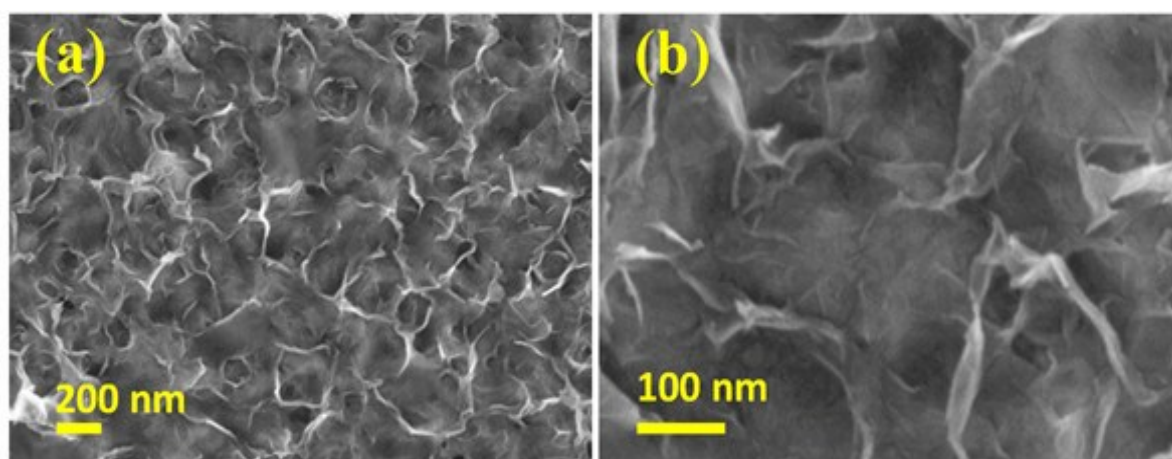

**Fig. S4** a and b. SEM images at different magnification of CuCo<sub>2</sub>S<sub>4</sub> NS-U.

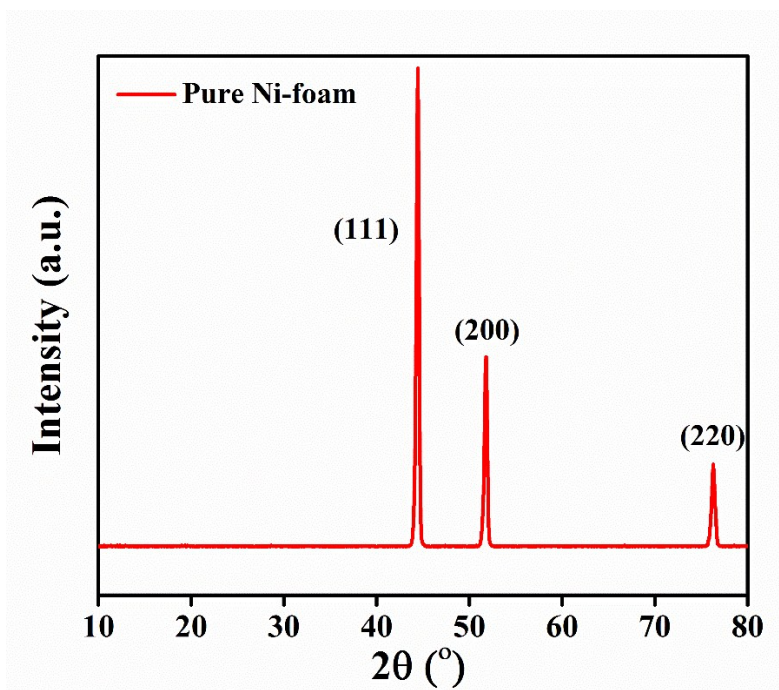

Fig. S5 XRD pattern of pure Ni foam.

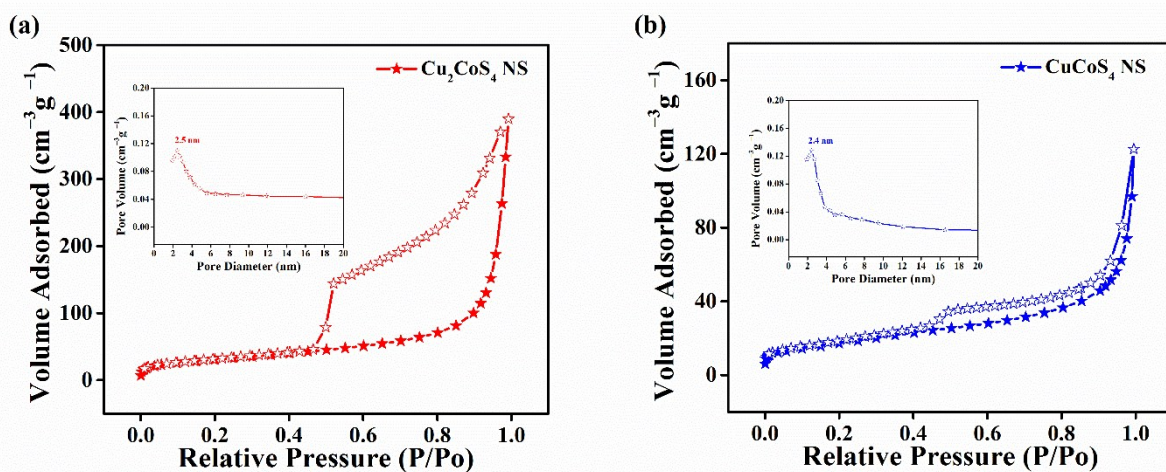

Fig. S6  $\text{N}_2$  sorption isotherms of (a)  $\text{Cu}_2\text{CoS}_4$  and (b)  $\text{CuCoS}_4$  NS arrays (inset shows their corresponding pore size distribution curves).

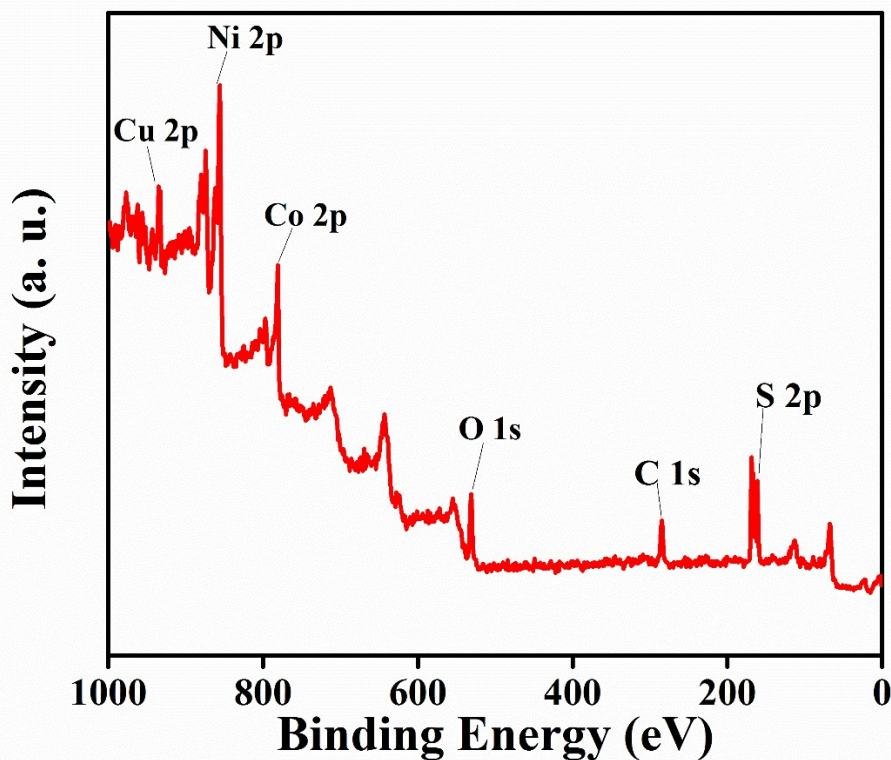

**Fig. S7** XPS survey spectrum of  $\text{CuCo}_2\text{S}_4$  NS arrays.

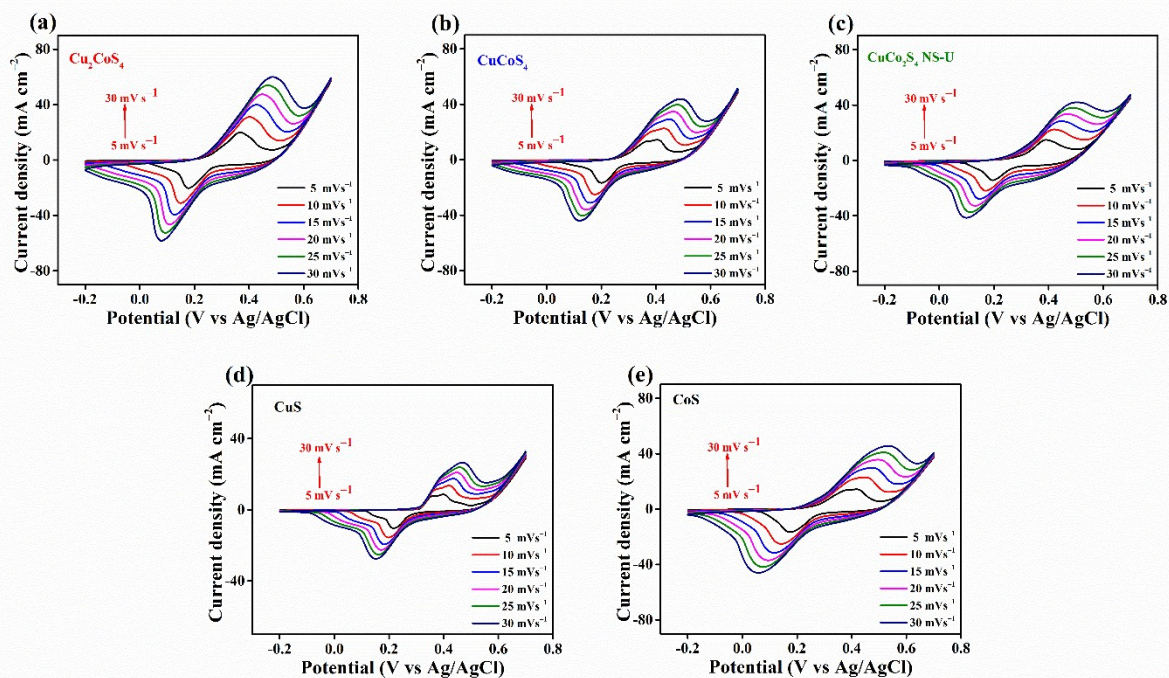

**Fig. S8** (a-e) CV curves of  $\text{Cu}_2\text{CoS}_4$  NS,  $\text{CuCoS}_4$  NS,  $\text{CuCo}_2\text{S}_4$  NS-U, CuS, and CoS electrodes with different scan rates from 5 to  $30 \text{ mV s}^{-1}$ .

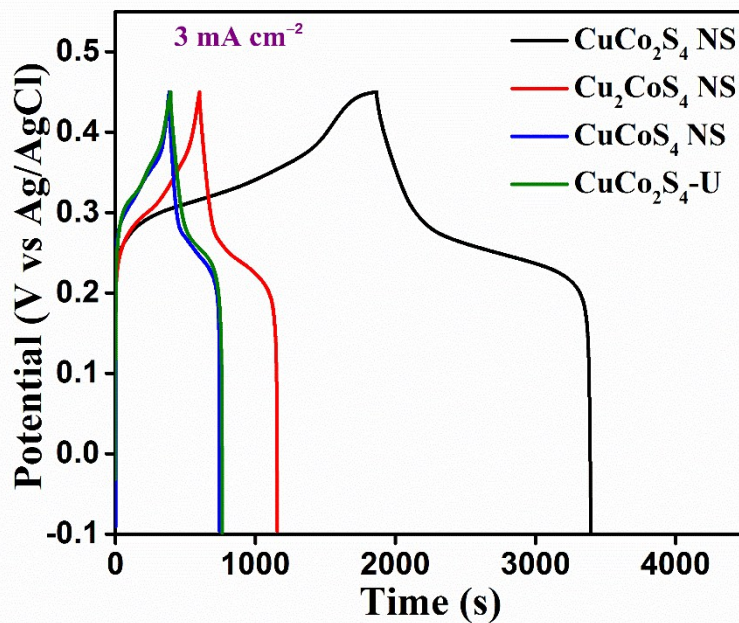

**Fig. S9** GCD curves of  $\text{CuCo}_2\text{S}_4$  NS,  $\text{Cu}_2\text{CoS}_4$  NS,  $\text{CuCoS}_4$  NS, and  $\text{CuCo}_2\text{S}_4$  NS-U electrodes at a current density of  $3 \text{ mA cm}^{-2}$ .

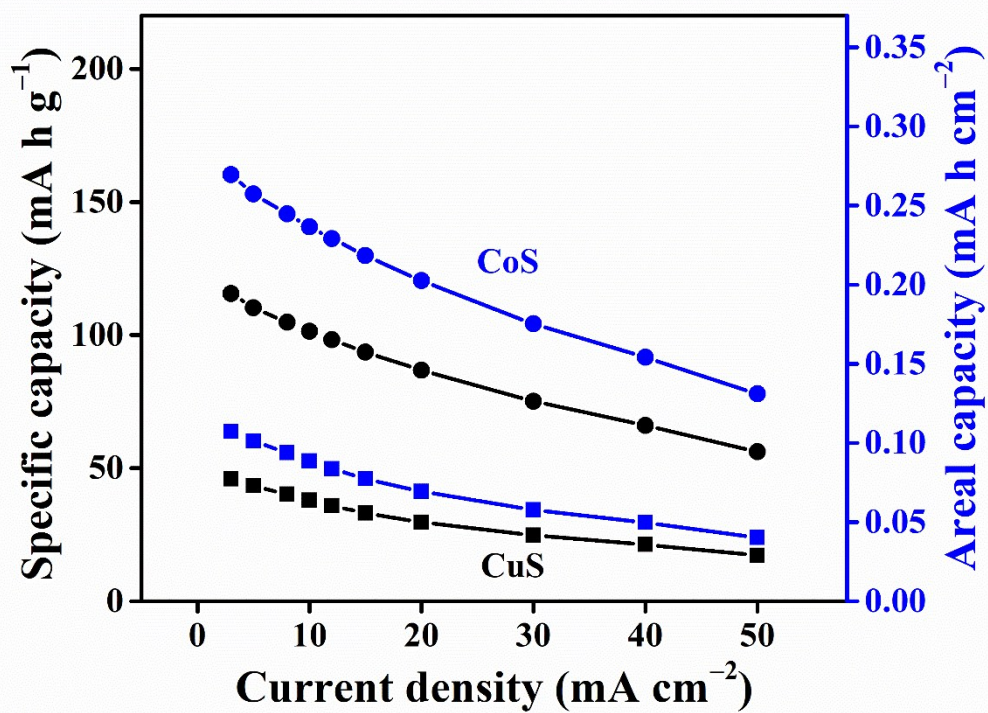

**Fig. S10** Specific and areal capacity of  $\text{CuS}$  and  $\text{CoS}$  electrodes as a function of current density.

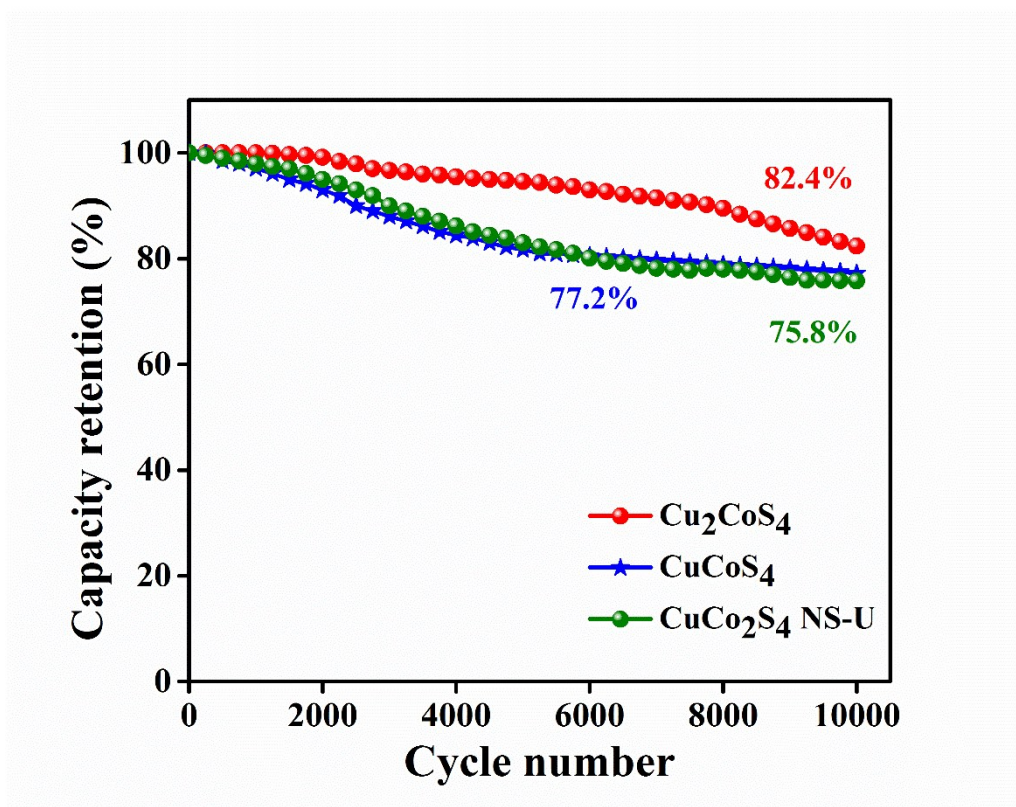

**Fig. S11** Cyclic performance of Cu<sub>2</sub>CoS<sub>4</sub> NS, and CuCoS<sub>4</sub> NS, and CuCo<sub>2</sub>S<sub>4</sub> NS-U electrodes at a current density of 30 mA cm<sup>-2</sup>.

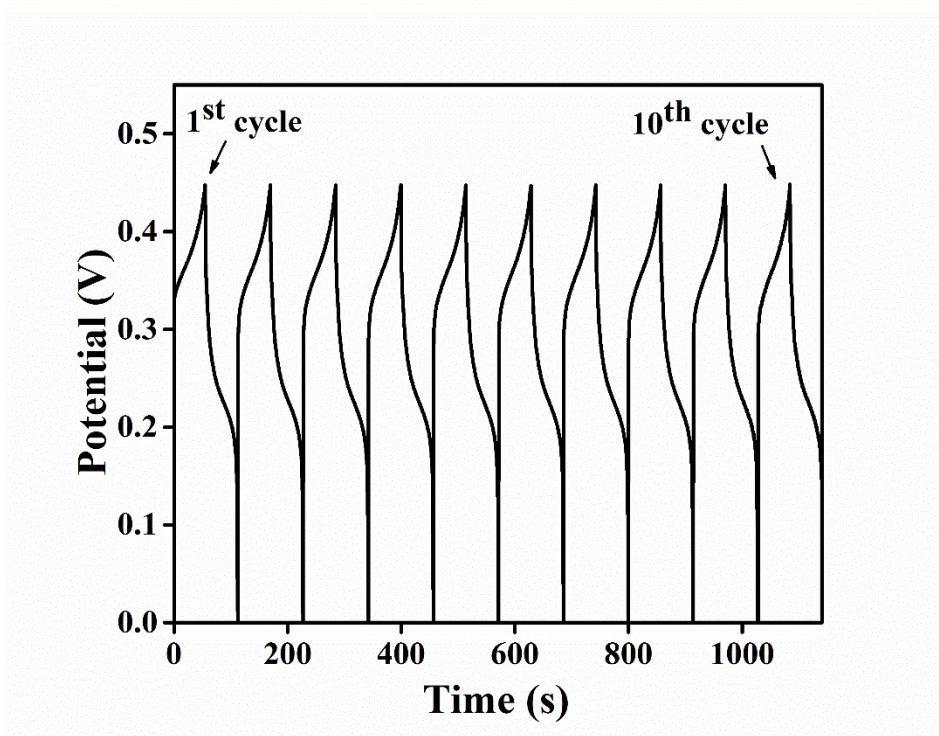

**Fig. S12** The first ten cycles of the fabricated CuCo<sub>2</sub>S<sub>4</sub> NS arrays at a current density of 30 mA cm<sup>-2</sup>.

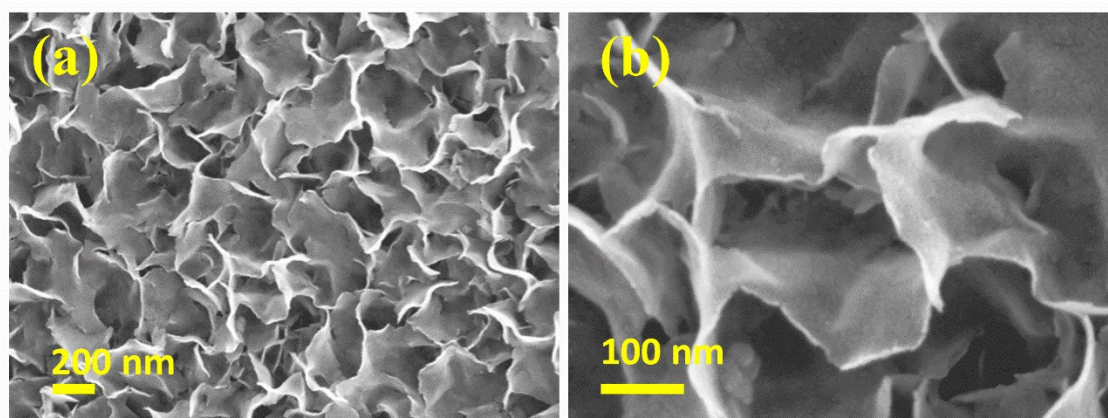

**Fig. S13** SEM images at different magnifications of  $\text{CuCo}_2\text{S}_4$  NS arrays (after 10000 charge-discharge cycling test).

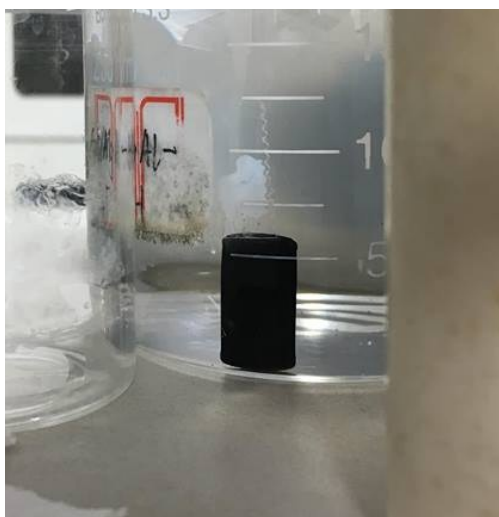

**Fig. S14** Digital photograph of  $\text{Fe}_2\text{O}_3/\text{NG}$  hydrogel with a perfect cylindrical shape.



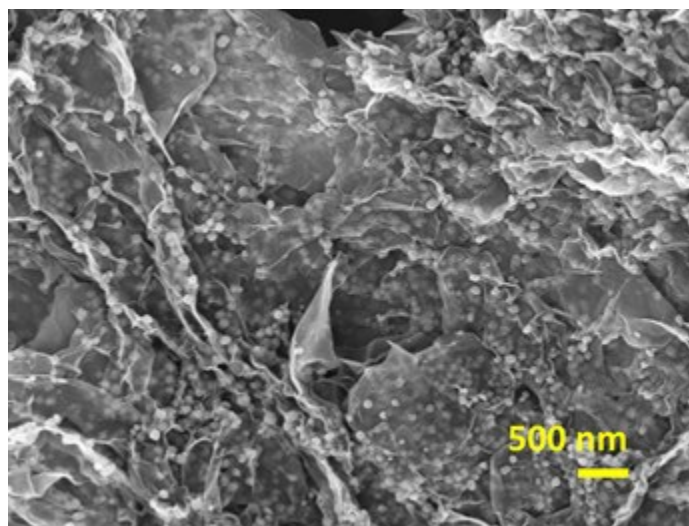

**Fig. S15** SEM image of Fe<sub>2</sub>O<sub>3</sub>/NG aerogel.

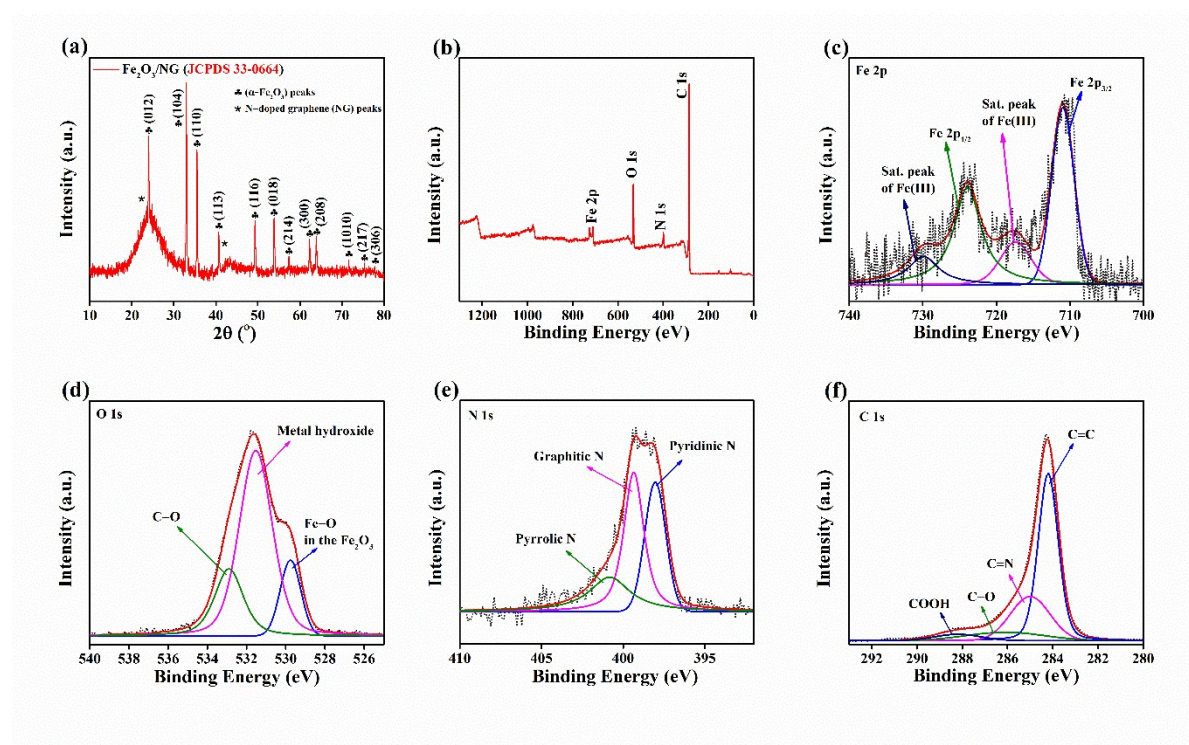

**Fig. S16** (a) XRD of the Fe<sub>2</sub>O<sub>3</sub>/NG aerogel, (b) XPS survey spectrum of Fe<sub>2</sub>O<sub>3</sub>/NG aerogel, High-resolution XPS spectra of (c) Fe 2p, (d) O 1s, (e) N 1s, and (f) C 1s for the Fe<sub>2</sub>O<sub>3</sub>/NG aerogel.

The high-resolution Fe 2p spectrum (Fig. S16c) displays the Fe 2p<sub>3/2</sub> centered at ~710.9 eV, and Fe 2p<sub>1/2</sub> centered at ~724.4 eV. In addition, the shake-up satellite peaks at ~717.3 eV, ~730.9 eV represent Fe (III) ions in the Fe<sub>2</sub>O<sub>3</sub> (Fig. S16c).<sup>1</sup> The O peak around 532 eV can be split into three peaks at (529.9 eV) which present the oxygen in the Fe<sub>2</sub>O<sub>3</sub>, (532.2 eV), and (533.3 eV) represent the existence of oxygen in the metal hydroxide and carbon bond, respectively (Fig. S16d).<sup>2</sup> The N 1s peak can be fitted to three components based on different binding energies: for pyridinic (398.1 eV), graphitic (399.2 eV), and pyrrolic (400.8 eV) Fig. S16e. Among the three nitrogen bonding formations, pyridinic N and graphitic N have been shown to result in highly active electrocatalytic sites for SC applications. The XPS spectrum of C 1s corresponds to the following carbon bonds: 284.2 eV (C=C), 285 eV (C-N), 286.6 eV (C-O), and 288.2 eV (COOH) (Fig. S16f).<sup>3</sup>

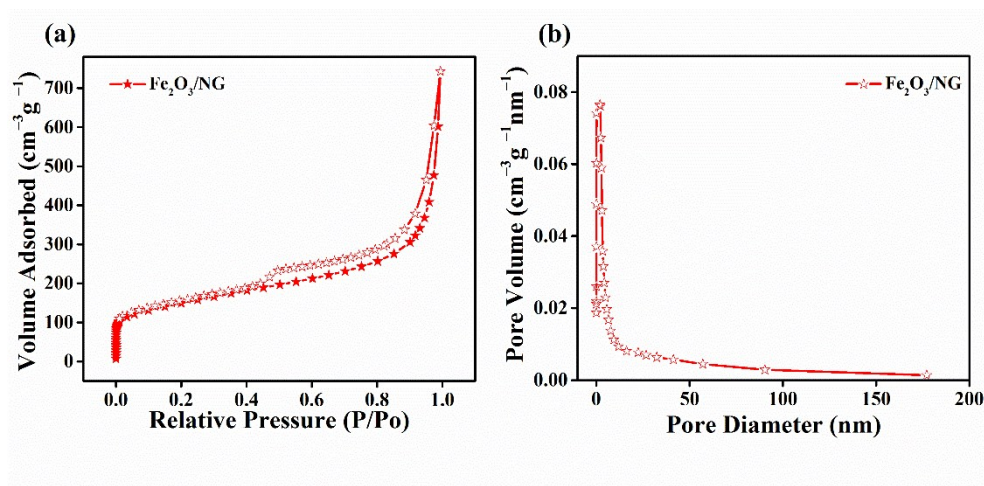

**Fig. S17** (a) N<sub>2</sub> sorption isotherms and (b) pore size distribution of the Fe<sub>2</sub>O<sub>3</sub>/NG aerogel.

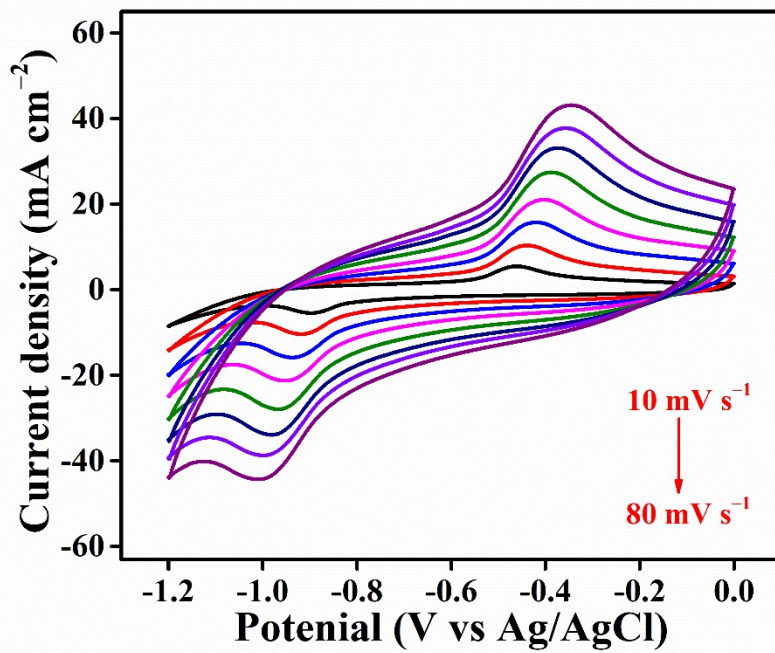

**Fig. S18** CV curves of Fe<sub>2</sub>O<sub>3</sub>/NG electrode at different scan rates from 10 to 80 mV s<sup>-1</sup>.

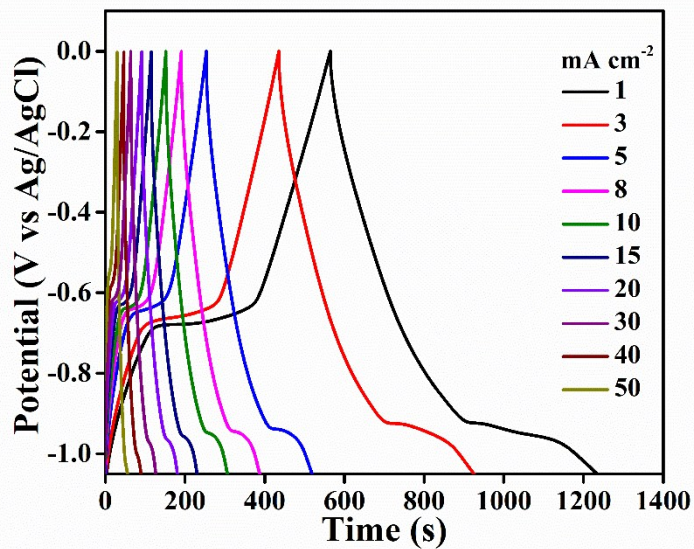

**Fig. S19** GCD curves of Fe<sub>2</sub>O<sub>3</sub>/NG electrode at different current densities from 1 to 50 mA cm<sup>-2</sup>.

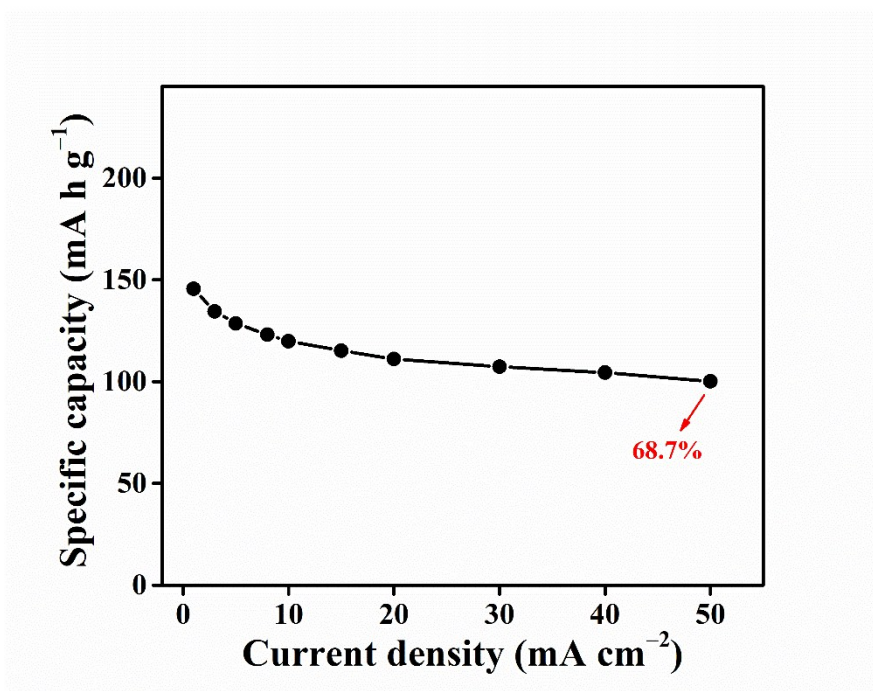

**Fig. S20** Specific capacity of Fe<sub>2</sub>O<sub>3</sub>/NG electrode as a function of current density.

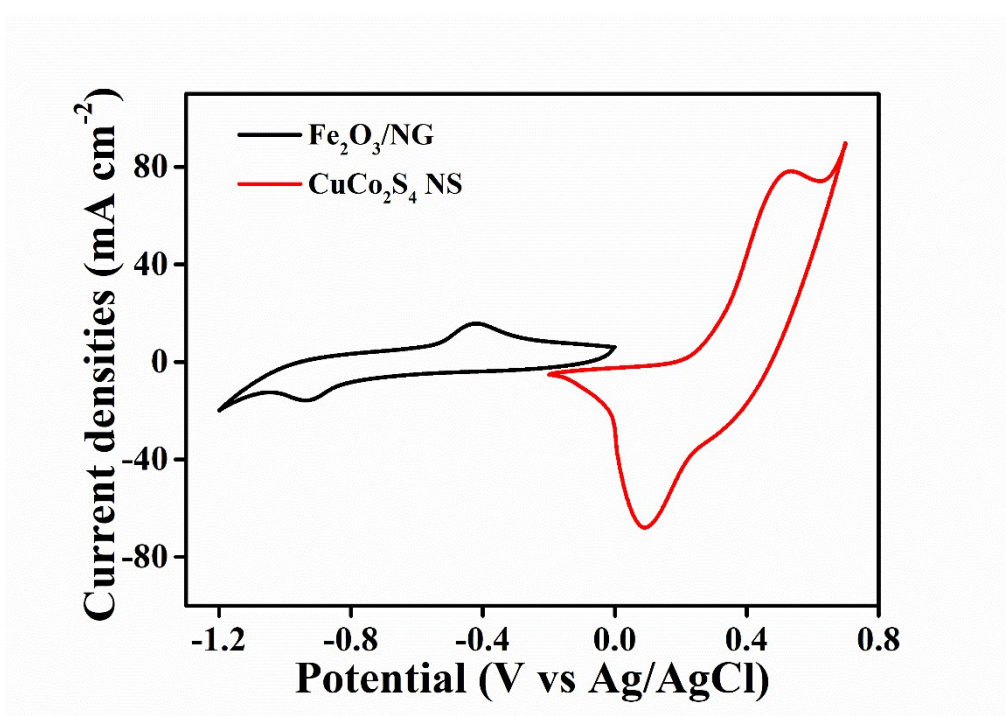

**Fig. S21** Fe<sub>2</sub>O<sub>3</sub>/NG (negative) and CuCo<sub>2</sub>S<sub>4</sub> (positive) electrodes measured at a scan rate of 30 mV s<sup>-1</sup> in three-electrode configurations.

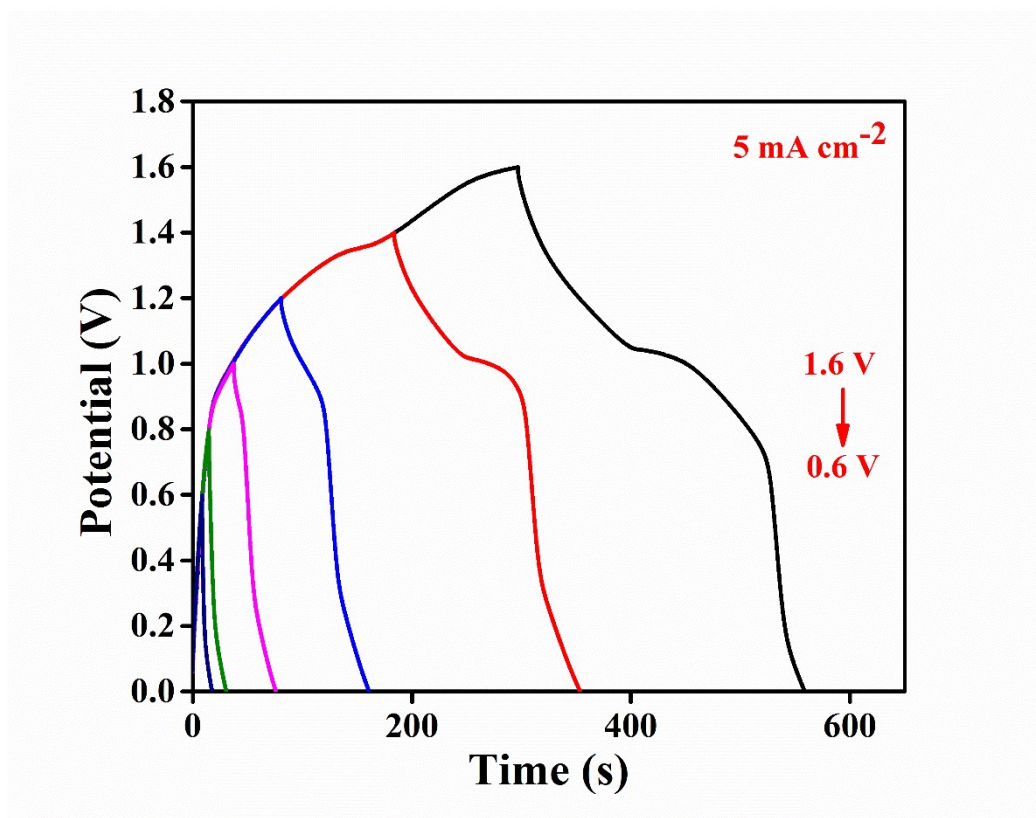

**Fig. S22** GCD of  $\text{CuCo}_2\text{S}_4/\text{Fe}_2\text{O}_3/\text{NG}$  ASC device at different potential windows from 0.6 to 1.6 V.

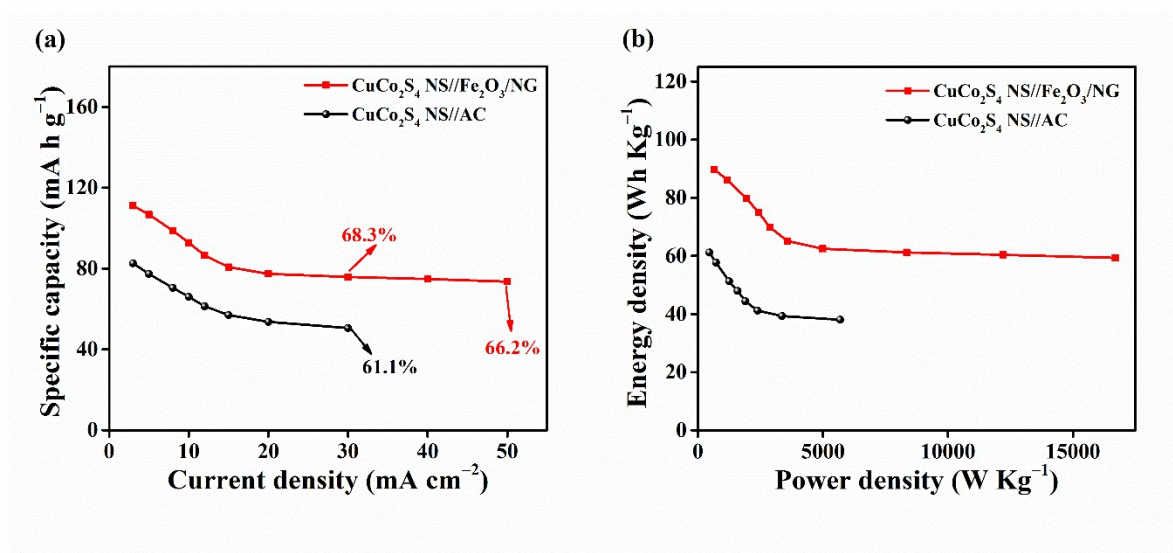

**Fig. S23** (a) specific capacities of the assembled devices as a function of current density, and (b) Energy vs power densities of the assembled  $\text{CuCo}_2\text{S}_4 \text{ NS//Fe}_2\text{O}_3/\text{NG}$  and  $\text{CuCo}_2\text{S}_4 \text{ NS//AC}$  ASC devices.

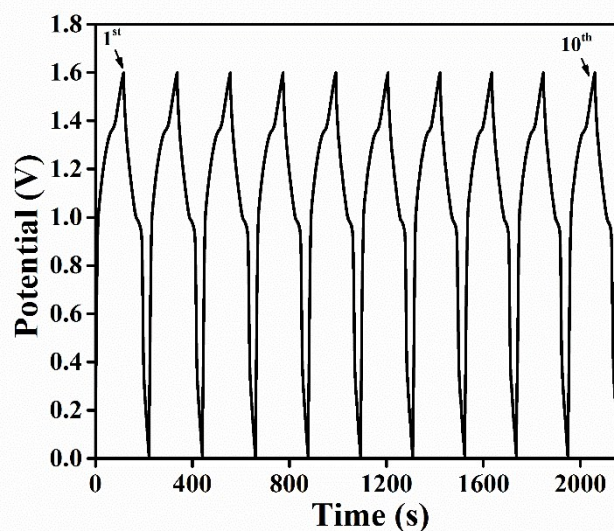

**Fig. S24** First 10 cycles of the  $\text{CuCo}_2\text{S}_4$  NS// $\text{Fe}_2\text{O}_3$ /NG ASC device at a current density of  $30 \text{ mA cm}^{-2}$ .

**Table S1** Elemental composition of  $\text{CuCo}_2\text{S}_4$  NS and  $\text{Fe}_2\text{O}_3$ /NG estimated from XPS and ICP-OES.

| Samples                      | Cu [at. %] | Co [at. %] | Fe [at. %] | C [at. %] | S [at. %] | N [at. %] | O [at. %] |
|------------------------------|------------|------------|------------|-----------|-----------|-----------|-----------|
| $\text{CuCo}_2\text{S}_4$ NS | 11.04      | 28.9       | —          | —         | 42.3      | —         | 17.8      |
| $\text{Fe}_2\text{O}_3$ /NG  | —          | —          | 0.75       | 81.64     | —         | 4.94      | 12.66     |

Cu, Co, S, Fe, N, C, and O contents were detected by XPS analysis and ICP-OES measurements

**Table S2** MOF derived CuCo<sub>2</sub>S<sub>4</sub> NS electrode electrochemical properties comparison with reported literatures.

| Electrode material                                                 | Areal capacitance/<br>capacity<br>[F cm <sup>-2</sup> /mA h cm <sup>-2</sup> ] | Specific capacitance/<br>capacity<br>[F g <sup>-1</sup> /mA h g <sup>-1</sup> ] | Current load                                       | Electrolyte | Stability<br>[Cycles] | References |
|--------------------------------------------------------------------|--------------------------------------------------------------------------------|---------------------------------------------------------------------------------|----------------------------------------------------|-------------|-----------------------|------------|
| CuCo <sub>2</sub> S <sub>4</sub> hollow nanoneedle arrays          | -                                                                              | 2163 F g <sup>-1</sup>                                                          | 6 mA cm <sup>-2</sup>                              | 0.6 M KOH   | 96.3%<br>[3000]       | [4]        |
| flower-like CuCo <sub>2</sub> S <sub>4</sub>                       | -                                                                              | 908.9 F g <sup>-1</sup>                                                         | 5 mA cm <sup>-2</sup>                              | 2 M KOH     | 91.1%<br>[2000]       | [5]        |
| Zn-Co-S NWs                                                        | 0.90 mAh cm <sup>-2</sup>                                                      | 366.7 mAh g <sup>-1</sup>                                                       | 3 mA cm <sup>-2</sup>                              | 6 M KOH     | 93.2%<br>[10000]      | [6]        |
| FeCo <sub>2</sub> S <sub>4</sub> -NiCo <sub>2</sub> S <sub>4</sub> | 3.5 F cm <sup>-2</sup>                                                         | 1519 F g <sup>-1</sup>                                                          | 5 mA cm <sup>-2</sup><br>(2.2 A g <sup>-1</sup> )  | 3 M KOH     | 77%<br>[3000]         | [7]        |
| NiCo <sub>2</sub> S <sub>4</sub> @Ni-Mn-LDH                        | 1.74 F cm <sup>-2</sup>                                                        | -                                                                               | 1 mA cm <sup>-2</sup>                              | 6 M KOH     | 88.3%<br>[1000]       | [8]        |
| Grass-like Ni <sub>3</sub> S <sub>2</sub> nanorod/nanowire         | 4.52 F cm <sup>-2</sup>                                                        | -                                                                               | 1.25 mA cm <sup>-2</sup>                           | 3 M KOH     | 108.3%<br>[2000]      | [9]        |
| NiCo <sub>2</sub> S <sub>4</sub> burl-like nanostructures          | 1.19 F cm <sup>-2</sup>                                                        | -                                                                               | 1 mA cm <sup>-2</sup>                              | 2 M KOH     | 79.9%<br>[2000]       | [10]       |
| FeCo <sub>2</sub> S <sub>4</sub>                                   | -                                                                              | 2411 F g <sup>-1</sup>                                                          | 2 mA cm <sup>-2</sup>                              | 3 M KOH     | 72%<br>[5000]         | [11]       |
| NiCo <sub>2</sub> S <sub>4</sub> @CoS <sub>x</sub> core-shell      | 4.74 F cm <sup>-2</sup>                                                        | -                                                                               | 5 mA cm <sup>-2</sup>                              | 1 M KOH     | 76.1%<br>[1500]       | [12]       |
| NiCo <sub>2</sub> S <sub>4</sub> nanotube arrays                   | 0.87 F cm <sup>-2</sup>                                                        | -                                                                               | 4 mA cm <sup>-2</sup>                              | 1 M KOH     | 96%<br>[2000]         | [13]       |
| MOF derived CuCo <sub>2</sub> S <sub>4</sub> NS arrays             | 0.96 mAh cm <sup>-2</sup>                                                      | 409.2 mA h g <sup>-1</sup>                                                      | 3 mA cm <sup>-2</sup><br>(0.97 A g <sup>-1</sup> ) | 2 M KOH     | 94.2%<br>[10000]      | This work  |

**Table S3** ASCs device properties comparison with reported literatures.

| Reported ASC Device                                                                        | Gravimetric/Geometric Capacity/Capacitance             | Device Window [V] | Gravimetric/ Geometric Energy                        | Gravimetric/ Geometric Power                       | Electrolyte                          | Stability [Cycles] | References |
|--------------------------------------------------------------------------------------------|--------------------------------------------------------|-------------------|------------------------------------------------------|----------------------------------------------------|--------------------------------------|--------------------|------------|
| Co-MOF/NF//AC                                                                              | 4.84 F cm <sup>-2</sup>                                | 0-1.6             | 1.72 Wh cm <sup>-2</sup>                             | 4 W cm <sup>-2</sup>                               | 2 M KOH                              | 69.7% [2000]       | [14]       |
| Zn-Ni-P NS//Fe <sub>2</sub> O <sub>3</sub> @NG                                             | 112.7 mAh g <sup>-1</sup> (1.99 mAh cm <sup>-3</sup> ) | 0-1.6             | 91.12 Wh kg <sup>-1</sup>                            | 611 W kg <sup>-1</sup>                             | PVA/KOH                              | 93% [10000]        | [15]       |
| CuCo <sub>2</sub> S <sub>4</sub> //MoO <sub>2</sub> @NC                                    | 184 F g <sup>-1</sup>                                  | 0-1.6             | 65.1 Wh kg <sup>-1</sup>                             | 800 W kg <sup>-1</sup>                             | PVA/KOH                              | 90.6% [5000]       | [16]       |
| Ni-Zn-Co-S-0.33 NSAs/NF//Bi <sub>2</sub> O <sub>3</sub> /NF                                | 114.7 mAh g <sup>-1</sup> (0.6 mAh cm <sup>-2</sup> )  | 0-1.6             | 91.7 Wh kg <sup>-1</sup>                             | 458 W kg <sup>-1</sup>                             | 3 M KOH                              | 88% [1000]         | [17]       |
| Ni-dMXNC//Ti <sub>3</sub> C <sub>2</sub> T <sub>x</sub>                                    | 4.7 mAh g <sup>-1</sup>                                | 0-1.8             | 0.01 Wh cm <sup>-3</sup>                             | 0.22 W cm <sup>-3</sup>                            | 1 M KOH                              | 72.1% [5000]       | [18]       |
| NiCo <sub>2</sub> S <sub>4</sub> @Ni(OH) <sub>2</sub> //AC                                 | 159 F g <sup>-1</sup>                                  | 0-1.8             | 65.7 Wh kg <sup>-1</sup>                             | 825 W kg <sup>-1</sup>                             | PVA/KOH                              | 90.7% [10000]      | [19]       |
| V-MOF//AC                                                                                  | 146.5 mF cm <sup>-2</sup>                              | 0-1.6             | 0.007 Wh cm <sup>-3</sup>                            | 0.07 W cm <sup>-3</sup>                            | PVA/ Na <sub>2</sub> SO <sub>4</sub> | 93.6% [10000]      | [20]       |
| NiCo <sub>2</sub> S <sub>4</sub> //rGO                                                     | 111.5 F g <sup>-1</sup>                                | 0-1.5             | 38.6 Wh kg <sup>-1</sup>                             | 1330 W kg <sup>-1</sup>                            | PVA/KOH                              | 99.3% [5000]       | [21]       |
| FeCo <sub>2</sub> S <sub>4</sub> //3D PNG                                                  | -                                                      | 0-1.6             | 76.1 Wh kg <sup>-1</sup>                             | 755 W kg <sup>-1</sup>                             | PVA/KOH                              | 82% [10000]        | [11]       |
| MnCo <sub>2</sub> O <sub>4</sub> @CoS//AC                                                  | 151.8 F g <sup>-1</sup>                                | 0-1.6             | 55.1 Wh kg <sup>-1</sup>                             | 477.3 W kg <sup>-1</sup>                           | PVA/KOH                              | 91% [6000]         | [22]       |
| MOF derived CuCo <sub>2</sub> S <sub>4</sub> NS arrays//Fe <sub>2</sub> O <sub>3</sub> /NG | 111.13 mAh g <sup>-1</sup> (2.1 mAh cm <sup>-3</sup> ) | 0-1.6             | 89.6 Wh kg <sup>-1</sup><br>0.68 Wh cm <sup>-3</sup> | 663 W g <sup>-1</sup><br>(5.0 W cm <sup>-3</sup> ) | PVA/KOH                              | 91.5% [10000]      | This work  |



## References

1. T. Yamashita and P. Hayes, *Applied surface science*, 2008, **254**, 2441-2449.
2. L. Tang, Z. Xie, G. Zeng, H. Dong, C. Fan, Y. Zhou, J. Wang, Y. Deng, J. Wang and X. Wei, *RSC Adv*, 2016, **6**, 25724-25732.
3. M. Du, J. Sun, J. Chang, F. Yang, L. Shi and L. Gao, *RSC Adv*, 2014, **4**, 42412-42417.
4. S. E. Moosavifard, S. Fani and M. Rahmanian, *Chem Commun*, 2016, **52**, 4517-4520.
5. Y. Zhang, J. Xu, Y. Zhang, Y. Zheng, X. Hu and Z. Liu, *J Mater Sci*, 2017, **52**, 9531-9538.
6. C. Li, J. Balamurugan, N. H. Kim and J. H. Lee, *Adv energy Mater*, 2018, **8**, 1702014-1702026.
7. J. Zhu, S. Tang, J. Wu, X. Shi, B. Zhu and X. Meng, *Adv energy Mater*, 2017, **7**, 1601234.
8. H. Wan, J. Liu, Y. Ruan, L. Lv, L. Peng, X. Ji, L. Miao and J. Jiang, *ACS applied materials & interfaces*, 2015, **7**, 15840-15847.
9. T. Li, Y. Zuo, X. Lei, N. Li, J. Liu and H. Han, *J Mater Chem A*, 2016, **4**, 8029-8040.
10. M. Sun, J. Tie, G. Cheng, T. Lin, S. Peng, F. Deng, F. Ye and L. Yu, *J Mater Chem A*, 2015, **3**, 1730-1736.
11. S. Tang, B. Zhu, X. Shi, J. Wu and X. Meng, *Adv energy Mater*, 2017, **7**, 1601985.
12. W. Fu, C. Zhao, W. Han, Y. Liu, H. Zhao, Y. Ma and E. Xie, *J Mater Chem A*, 2015, **3**, 10492-10497.
13. H. Li, M. Yu, F. Wang, P. Liu, Y. Liang, J. Xiao, C. Wang, Y. Tong and G. Yang, *Nat Commun*, 2013, **4**, 1894.
14. G. Zhu, H. Wen, M. Ma, W. Wang, L. Yang, L. Wang, X. Shi, X. Cheng, X. Sun and Y. Yao, *Chem Commun*, 2018, **54**, 10499-10502.
15. T. T. Nguyen, J. Balamurugan, N. H. Kim and J. H. Lee, *J Mater Chem A*, 2018, **6**, 8669-8681.
16. S. Liu, Y. Yin, K. S. Hui, K. N. Hui, S. C. Lee and S. C. Jun, *Adv Sci*, 2018, **5**, 1800733-1800744.
17. Y. Huang, L. Quan, T. Liu, Q. Chen, D. Cai and H. Zhan, *Nanoscale*, 2018, **10**, 14171-14181.
18. Q. X. Xia, J. Fu, J. M. Yun, R. S. Mane and K. H. Kim, *RSC Adv*, 2017, **7**, 11000-11011.
19. J. Huang, J. Wei, Y. Xiao, Y. Xu, Y. Xiao, Y. Wang, L. Tan, K. Yuan and Y. Chen, *ACS Nano*, 2018, **12**, 3030-3042.
20. Y. Yan, Y. Luo, J. Ma, B. Li, H. Xue and H. Pang, *Small*, 2018, **14**, 1801815.
21. F. Lu, M. Zhou, W. Li, Q. Weng, C. Li, Y. Xue, X. Jiang, X. Zeng, Y. Bando and D. Golberg, *Nano Energy*, 2016, **26**, 313-323.
22. G. Liu, B. Wang, T. Liu, L. Wang, H. Luo, T. Gao, F. Wang, A. Liu and D. Wang, *J Mater Chem A*, 2018, **6**, 1822-1831.
